# Supplementary material for: RNA polymerase II progression through H3K27me3-enriched gene bodies requires JMJD3 histone demethylase
Source: PubMed Central journal article supplement — Mol Biol Cell. 2013 Feb 1;24(3):351–60. doi: 10.1091/mbc.E12-07-0561 (PMC3564542; doi:10.1091/mbc.e12-07-0561), 2013-02-01
Supplement: supp_E12-07-0561v1_SupplementaryMaterial.pdf [file supp_E12-07-0561v1_SupplementaryMaterial.pdf]

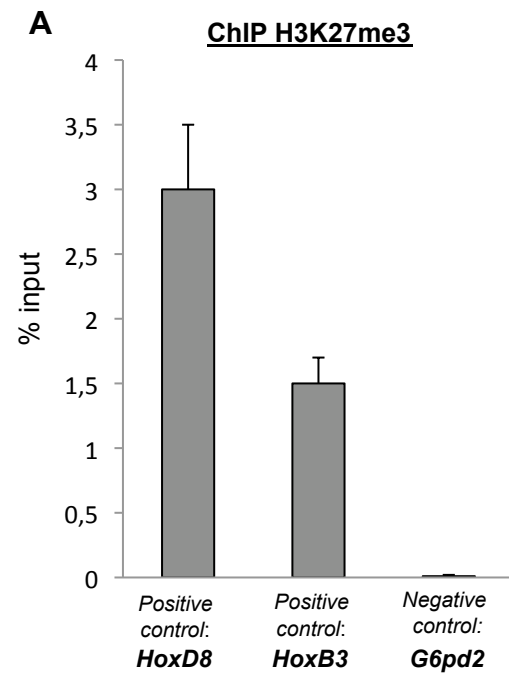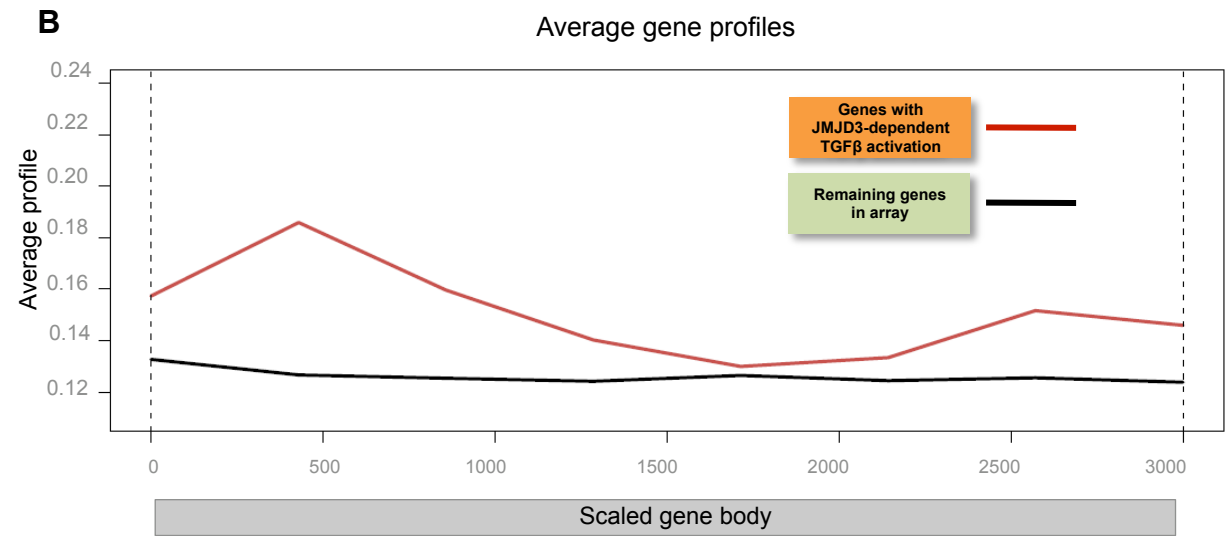

SUPPLEMENTARY FIGURE 2

**A** ChIP JMJD3

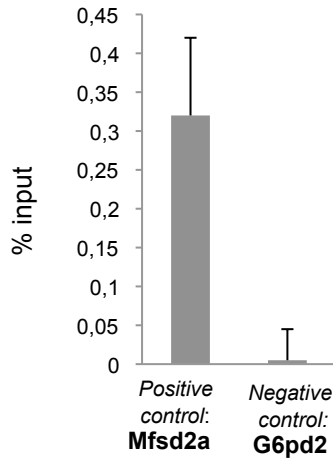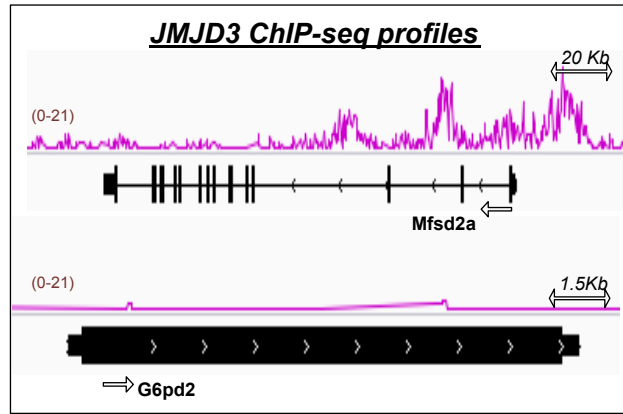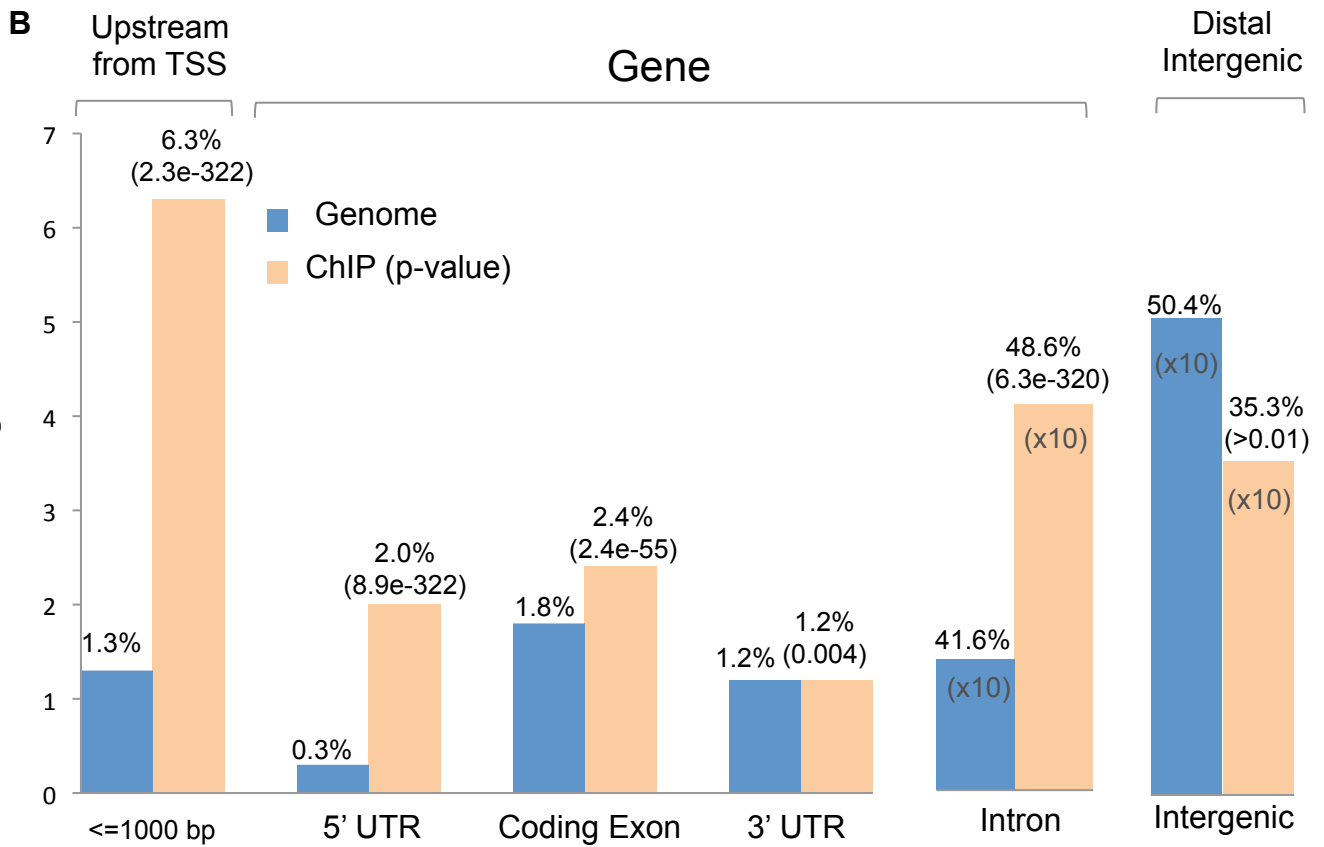

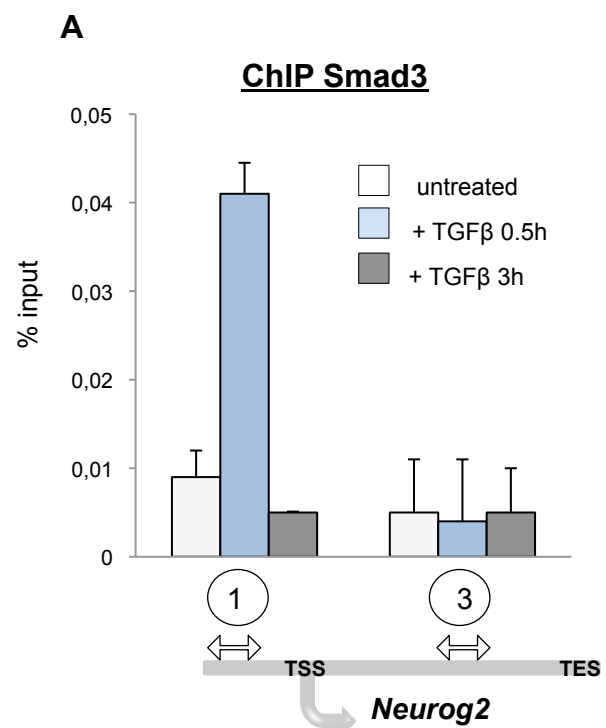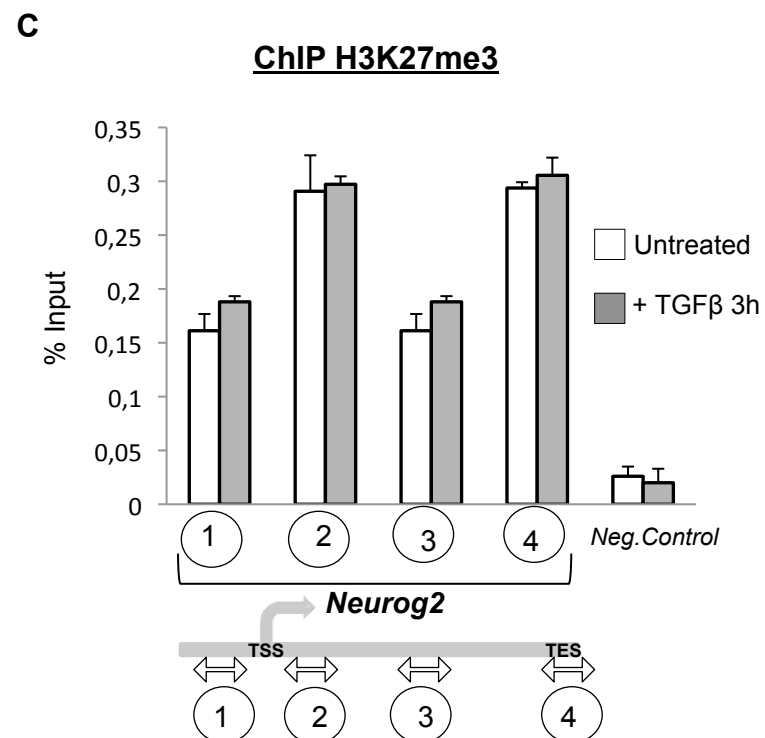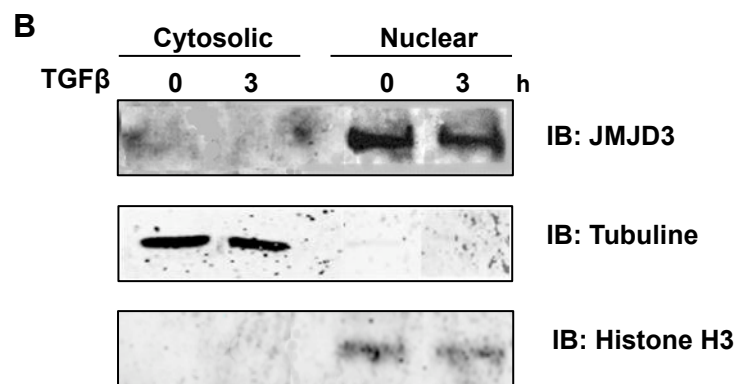

**D**

Nucleotide coverage by peaks and their overlap on intragenic regions

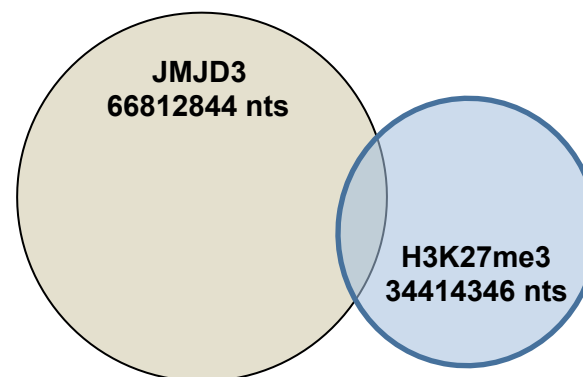

A

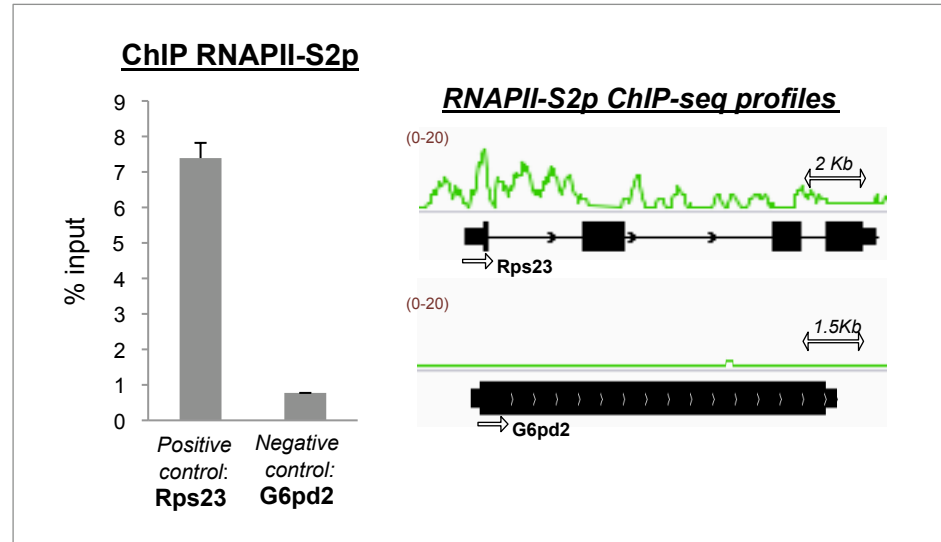

B

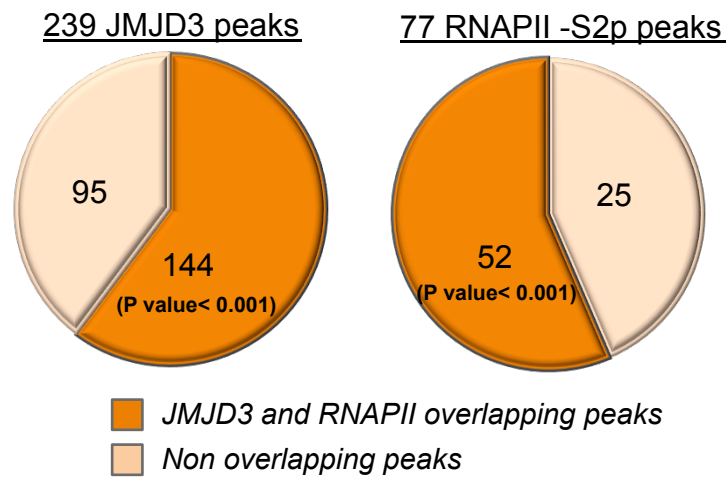

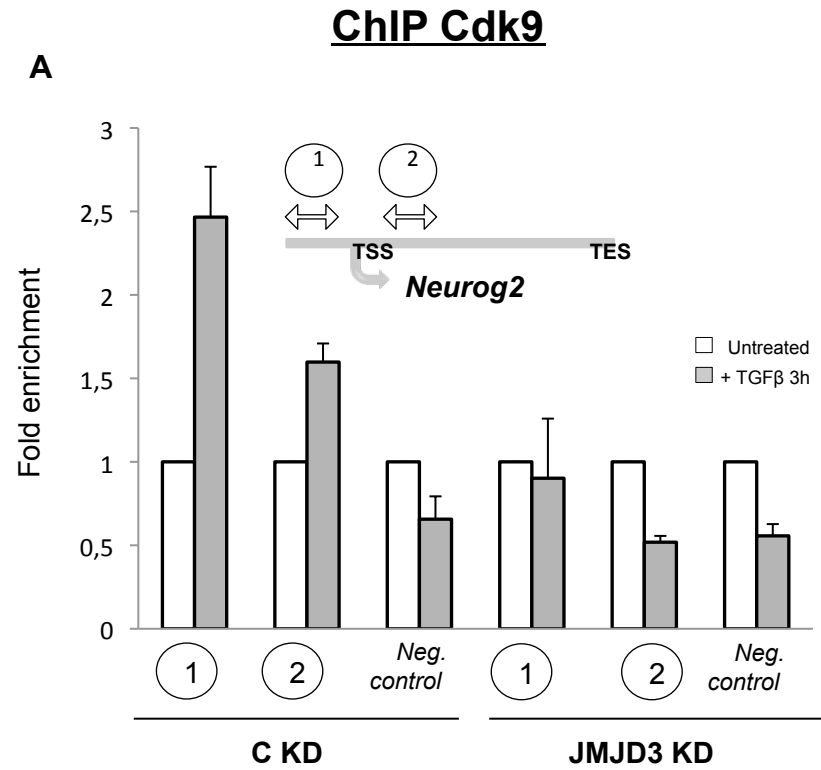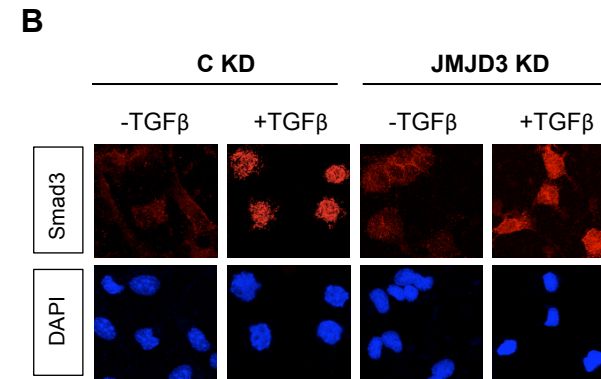

**Table S1: List of JMJD3 dependent TGFβ activated genes (JDTA genes)**

| ID            | Gene name     | FC C KD     | Adj. P value C KD | FC JMJD3 KD | Adj. P value JMJD3 KD |
|---------------|---------------|-------------|-------------------|-------------|-----------------------|
| A_55_P2004179 | Col2a1        | 16,24377065 | 5,17111E-12       | 11,35083454 | 2,02622E-11           |
| A_55_P2067707 | Mep1a         | 9,673053053 | 5,75141E-12       | 5,207245062 | 1,29147E-10           |
| A_55_P2000943 | Nrip3         | 8,760586025 | 5,17111E-12       | 5,73849171  | 3,36363E-11           |
| A_51_P277006  | Chst8         | 7,167338724 | 1,43765E-10       | 3,671794975 | 5,33605E-09           |
| A_55_P2004881 | D18Ertd653e   | 6,223014967 | 3,64733E-08       | 4,224942641 | 2,89604E-07           |
| A_55_P2014124 | Gjb3          | 6,105667375 | 3,05407E-09       | 2,859304311 | 3,5372E-07            |
| A_52_P650855  | Myo1d         | 6,048224121 | 1,25381E-07       | 3,522676964 | 3,49575E-06           |
| A_55_P2394308 | Fst           | 5,76162566  | 5,24848E-11       | 4,040965267 | 3,61273E-10           |
| A_66_P124858  | Diras2        | 5,428953616 | 1,17809E-08       | 2,918104085 | 6,4788E-07            |
| A_55_P2143282 | Nkd2          | 4,800835583 | 3,00506E-10       | 3,391727965 | 3,06396E-09           |
| A_55_P2008921 | Cdkl4         | 4,528871302 | 1,43765E-10       | 2,806693074 | 4,31928E-09           |
| A_55_P2076777 | Mdfi          | 3,698805762 | 0,000214813       | 1,620520568 | 0,145976114           |
| A_55_P2020128 | Dhrs3         | 3,369679195 | 3,70818E-07       | 2,478987695 | 6,72899E-06           |
| A_52_P589169  | 2010111I01Rik | 3,237928595 | 2,02799E-08       | 2,17557339  | 8,01831E-07           |
| A_52_P368306  | Tmem100       | 3,089445187 | 7,05518E-09       | 2,300495944 | 9,36617E-08           |
| A_51_P157042  | Ctgf          | 3,084118679 | 3,95019E-09       | 1,860099621 | 8,12844E-07           |
| A_51_P474701  | Fbp1          | 3,015193021 | 1,89138E-06       | 1,931896371 | 0,000240504           |
| A_51_P426270  | Mgp           | 2,924585339 | 1,32646E-08       | 1,955743502 | 8,05297E-07           |
| A_52_P579933  | Slc16a6       | 2,911019452 | 0,025861137       | 1,681506986 | 0,366414703           |
| A_55_P2026734 | Rgs4          | 2,764342889 | 2,33829E-07       | 1,901461515 | 1,9754E-05            |
| A_55_P2186005 | Sphk1         | 2,616375891 | 8,37817E-07       | 1,838175679 | 6,96513E-05           |
| A_51_P419637  | Dclk3         | 2,558304311 | 2,89895E-07       | 1,000905063 | 0,997318218           |
| A_55_P2036693 | Cd40          | 2,526512809 | 3,8619E-08        | 1,746196126 | 4,12245E-06           |
| A_51_P430929  | Fam20a        | 2,482678994 | 8,54049E-06       | 1,763493455 | 0,000655253           |
| A_51_P433615  | Klhl6         | 2,48151149  | 2,89895E-07       | 1,67686575  | 6,48653E-05           |
| A_51_P270904  | 9930023K05Rik | 2,38667137  | 9,83479E-08       | 1,682658589 | 1,13915E-05           |
| A_66_P114528  | Trim67        | 2,371942353 | 1,28002E-07       | 1,731564543 | 8,98887E-06           |
| A_51_P115005  | Edn1          | 2,32039475  | 1,71961E-07       | 1,420304275 | 0,000542891           |
| A_55_P2094262 | Tph1          | 2,314226864 | 8,87221E-08       | 1,506988454 | 6,61741E-05           |
| A_52_P665675  | Abca1         | 2,281425052 | 7,40917E-08       | 1,708480827 | 4,00435E-06           |
| A_52_P59318   | Rdh10         | 2,257786029 | 1,08852E-07       | 1,540946918 | 4,13336E-05           |
| A_51_P370615  | Neurog2       | 2,225207059 | 2,60523E-07       | 1,515086898 | 0,000123853           |
| A_52_P103391  | B4galt1       | 2,189181908 | 2,02418E-07       | 1,389214555 | 0,000618742           |
| A_52_P274496  | Tspan18       | 2,152184291 | 4,80919E-06       | 1,423689428 | 0,004281154           |
| A_55_P2162988 | Tmem179       | 1,990964802 | 9,92766E-06       | 1,194350427 | 0,153195495           |
| A_51_P272876  | Fam46a        | 1,97807362  | 0,000871338       | 1,332826082 | 0,162186072           |
| A_51_P507290  | Klf5          | 1,953562115 | 1,11204E-05       | 1,40258016  | 0,004209651           |
| A_66_P128434  | Kit           | 1,941501294 | 6,02506E-06       | 1,403052025 | 0,002411519           |
| A_52_P220783  | Tmem229b      | 1,933978576 | 8,73152E-05       | 1,238846803 | 0,159249557           |

|               |         |             |             |              |             |
|---------------|---------|-------------|-------------|--------------|-------------|
| A_55_P2150717 | Eomes   | 1,927385624 | 7,98103E-06 | 1,20240957   | 0,101212643 |
| A_55_P2162160 | Anp32a  | 1,862809208 | 0,024833375 | 1,186954174  | 0,645589431 |
| A_55_P2137828 | Gprc5b  | 1,860442937 | 0,033286694 | 1,015437376  | 0,976357317 |
| A_52_P420504  | Acta2   | 1,816676055 | 4,23994E-05 | 1,272968737  | 0,043262924 |
| A_65_P12104   | Tmtc1   | 1,806603733 | 0,000111006 | 1,199888975  | 0,201423888 |
| A_55_P2021505 | Adra2a  | 1,738584867 | 4,27614E-05 | 1,18876677   | 0,136791324 |
| A_55_P2052690 | Synm    | 1,723948723 | 4,05132E-06 | 1,252957708  | 0,008018084 |
| A_52_P547662  | P2ry1   | 1,697997363 | 0,003909029 | 1,21760938   | 0,356420217 |
| A_52_P266132  | Fgl2    | 1,693091619 | 4,33468E-06 | 1,227583057  | 0,01276981  |
| A_51_P100298  | Stx3    | 1,649995849 | 0,008106837 | 1,150072101  | 0,569688875 |
| A_51_P136355  | Gng11   | 1,608031556 | 0,042883584 | 1,375742982  | 0,21570279  |
| A_55_P2066484 | Crtc3   | 1,585150196 | 0,001979758 | 1,210165606  | 0,228389098 |
| A_52_P489295  | Adamts1 | 1,582328466 | 6,16479E-05 | 1,074843427  | 0,558269244 |
| A_55_P1967168 | Lrp4    | 1,565816799 | 0,021115522 | 1,119433674  | 0,66863292  |
| A_51_P361220  | Fzd4    | 1,558765654 | 0,004990779 | 1,301308632  | 0,104895417 |
| A_55_P1985544 | Kcnk10  | 1,551258682 | 0,04564364  | 1,202201616  | 0,512342277 |
| A_55_P2143517 | Fstl1   | 1,533274735 | 0,001782867 | 1,211950955  | 0,173817278 |
| A_55_P1990755 | Ppp3r1  | 1,528974059 | 0,047556012 | -1,001492869 | 0,997601452 |
| A_52_P502577  | S1pr3   | 1,514379478 | 0,014303026 | 1,282293771  | 0,17530289  |
| A_55_P2122160 | Ssfa2   | 1,513834419 | 0,001627512 | 1,158220456  | 0,31314124  |
| A_66_P110490  | Polr3h  | 1,510900629 | 4,9525E-05  | 1,151409852  | 0,104056425 |
| A_55_P2010116 | Rab27b  | 1,505037552 | 0,000113448 | 1,155244668  | 0,13138029  |

**Table S2. Primers used in the manuscript****Primers used for ChIPs**

|                           |                      |
|---------------------------|----------------------|
| Mouse Neurog2 region1 Fw: | TTAACTGGAGTGCCTTGG   |
| Mouse Neurog2 region1 Rw: | CTCGTGTGTTGTCGTTCC   |
| Mouse Neurog2 region2 Fw: | TAAGGAGAGTCGTGTGCC   |
| Mouse Neurog2 region2 Rw: | GCACTCCAGTTAAAGCCG   |
| Mouse Neurog2 region3 Fw: | CACAACCTAAACGCCGC    |
| Mouse Neurog2 region3 Rw: | TCTTCGTGAGCTTGGCAT   |
| Mouse Neurog2 region4 Fw: | GGGTCATGTTTGATGTGGA  |
| Mouse Neurog2 region4 Rw: | AGGGTTGGTGTTCAGTAG   |
| Mouse G6pd2 Fw:           | ACAGTCTATGAAGCAGTCAC |
| Mouse G6pd2 Rw:           | CTCCACTATGATGCGGTTA  |
| Mouse MFSD2 Fw:           | TGCTTATGAACGCCATCTG  |
| Mouse MFSD2 Rw:           | AGCTGTTCTTCTTGTGTCC  |
| Mouse Hoxb3 Fw:           | GAAGGATGGGAGAGTTGC   |
| Mouse Hoxb3 Rw:           | AACATTACACCACAACCAAG |
| Mouse Hoxd8 Fw:           | CAGTCTCTGGCAGTTCTTT  |
| Mouse Hoxd8 Rw:           | CCTGTCCTGTGCTTAACG   |
| Mouse Stx3 FW:            | CCTAAAGTTTCACACTCGC  |
| Mouse Stx3 RW:            | GCCTATTTCTTGTGCGGT   |

**Primers used for cDNA**

|                   |                      |
|-------------------|----------------------|
| Mouse Neurog2 Fw: | CACAACCTAAACGCCGC    |
| Mouse Neurog2 Rw: | TCTTCGTGAGCTTGGCAT   |
| Mouse 23S Fw:     | CGTCAGGGTGCAGCTCATTA |
| Mouse 23S Rw:     | GGCACGAACGCTGTGATCTT |



## SUPPLEMENTARY FIGURE LEGENDS

### RNA Polymerase II progression through H3K27me3-enriched gene bodies

#### requires JMJD3 histone demethylase

#### Figure S1

(A) ChIP assays analyzed by qPCR performed in NSCs using H3K27me3 antibody.

Analyzed genes are indicated in the X-axis.

(B) Metagene profiles of H3K27me3 coverage for JDTA genes and for the remaining genes of the array (see orange and green box in legend, respectively).

#### Figure S2

(A) ChIP assays analyzed by qPCR performed in TGF $\beta$  stimulated (3h) NSCs using JMJD3 antibody. Analyzed genes are indicated in the X-axis. Right panel shows representation of JMJD3 coverage by normalized wig files for the indicated RefSeq genes. Right numbers of the panels represent the length of the visualized region. Left numbers indicate the scale of the Y axis (number of reads).

(B) Genomic distribution of JMJD3 in TGF $\beta$  stimulated NSCs. Relative enrichment level of JMJD3 regions in different genomic features (orange bars) with respect to the genome background (blue bars). P-values (calculated using one-sided binomial test) show the significance of the relative enrichment with respect to the background. Only percentages of the ChIP regions that reside either upstream from TSS ( $\leq 1000$  bp) or on gene bodies (5'UTRs, coding exons, 3'UTRs and introns) have a significant enrichment of JMJD3 binding (p values < 0,01).

### Figure S3

(A) Smad3 ChIP assays analyzed by qPCR performed in NSCs prior to (0h) and after TGF $\beta$  treatment (0.5h and 3h). Analyzed gene regions are indicated in the X-axis. Error bars indicate s.d.

(B) Immunoblot of nuclear and cytosolic fractions of NSCs prior to or after TGF $\beta$  treatment (3h) using JMJD3, tubuline or histone H3 antibodies.

(C) H3K27me3 ChIP assays analyzed by qPCR performed in JMJD3 KD NSCs untreated (white bars) or TGF $\beta$  treated (3h) (grey bars). Regions analyzed for *Neurogenin2* locus and the negative control gene (*G6pd2*) are indicated in the X-axis. Error bars indicate s.d.

(D) Venn diagram showing the nucleotides occupied by H3K27me3 and JMJD3 within the gene bodies from the set of “remaining genes in array” (see Figure1, green box).

### Figure S4

(A) ChIP assays analyzed by qPCR performed in TGF $\beta$  stimulated (3h) NSCs or using RNAPII-S2p antibody. Analyzed genes are indicated in the X-axis. Right panel shows representation of RNAPII-S2p coverage by normalized wig files for the indicated RefSeq genes. Numbers on the right of the panels represent the length of the visualized region. Numbers on the left indicate the scale of the Y axis (number of reads).

(B) The total peaks for JMJD3 (239) and for RNAPII (77) found in the coding region of *JDTA* genes and the overlapping between them.

### Figure S5

(A) Cdk9 ChIP experiment analyzed by qPCR performed in C KD and JMJD3 KD NSCs prior to (0h) and after TGF $\beta$  treatment (3h). Regions analyzed for *Neurog2* locus

and the negative control (Stx3 intergenic region) are indicated in the X-axis. Error bars indicate s.d.

(B) Immunostaining of NSCs and JMJD3 KD NSCs with Smad3 antibody (red) prior to or after TGF $\beta$  treatment. Images in blue are DAPI staining (DNA).
